# Supplementary material for: Ccq1–Raf2 interaction mediates CLRC recruitment to establish heterochromatin at telomeres
Source: PubMed Central journal article supplement (PMC8424379; doi:10.26508/lsa.202101106), 2021-09-07
Supplement: LSA-2021-01106_SdataF2.pdf [file LSA-2021-01106_SdataF2.pdf]

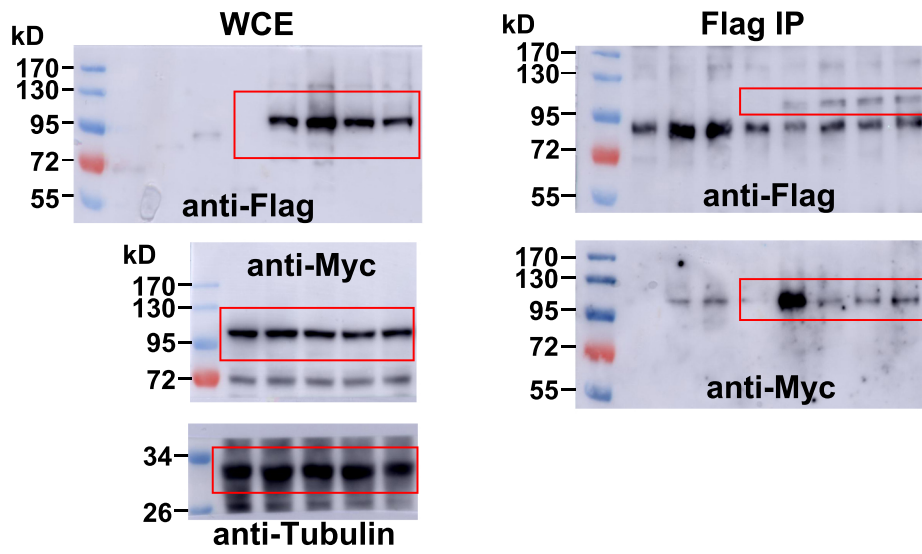

**Fig 2F**
