# Supplementary material for: Ccq1–Raf2 interaction mediates CLRC recruitment to establish heterochromatin at telomeres
Source: Life Sci Alliance. 2021 Sep 7;4(11):e202101106. doi: 10.26508/lsa.202101106 (PMC8424379; doi:10.26508/lsa.202101106)
Supplement: Supplementary file 2 [file LSA-2021-01106_SdataF3.xlsx]

## Sheet: Fig 3B
Source data for Fig 3F
Description: The expressions of his3+ reporter gene and TERRA were monitored by RT-qPCR analysis as described in the methods. The graph represents three independent experiments listed below. Error bars represent SEM.
					RT
	ccq1WT			ccq1L511R			ccq1V516R
his3+	0.0785341	0.0553791	0.0253187	44.4417	51.9493	52.8617	16.1362	16.179	12.8749
TERRA	0.866969	0.756334	0.885323	46.7873	85.7366	67.215	36.6119	46.151	36.4282
dg	2.64972	2.39811	2.26187	1.60371	1.45728	2.00498	1.95309	1.78403	1.64673
Source data for Fig 3B-D, G and H
Description: ChIP-qPCR analysis as described in the methods. The graph represents three independent experiments listed below. Error bars represent SEM.
	Enrichment of Ccq1-3Flag at telomeres (Fig 3B)
	no tag			ccq1WT			ccq1L511R			ccq1V516R
23 bp	0.542366	0.650037	0.711935	3.19319	3.82076	2.66736	2.9752	2.6214	3.11119	2.22278	2.84086	3.37279
116 bp	0.576781	0.783768	0.660056	2.11099	2.32654	1.63453	1.33218	1.26622	1.64453	1.17639	1.48754	1.60423
744 bp	0.866321	0.963094	0.982995	1.44107	1.8517	1.24823	0.911681	0.831816	0.840788	0.844892	0.909234	0.832566
	Enrichment of Raf2-13Myc at telomeres (Fig 3C)
	no tag			ccq1WT			ccq1L511R			ccq1V516R
23 bp	0.567674	0.535816	0.482803	21.8924	14.6531	23.3749	1.41405	1.02496	1.11376	2.41445	1.2959	1.50724
116 bp	0.561794	0.579016	0.434198	13.058	7.66159	11.1122	0.98653	0.733772	0.878585	1.54097	1.06468	0.937329
744 bp	0.807575	0.804159	0.719294	8.13009	6.36974	8.26368	0.932737	0.721979	1.01315	1.10617	0.850388	0.883863
1297 bp	1.25688	1.41077	0.700176	7.07364	5.95322	6.55385	0.86141	0.926373	0.929466	1.17423	1.20397	1.00844
2012 bp	0.949061	0.640873	0.544574	7.79203	5.16962	7.06975	0.855316	0.736055	0.826576	1.85417	0.751998	1.13431
2758 bp	1.77746	1.89193		7.02962	6.1807	6.84651	1.52917	1.05839	1.19322	2.17897	1.74875	2.12106
	Enrichment of Clr4-3Myc at telomeres (Fig 3D)
no tag		1.02887	1.01289	0.87488
ccq1WT		4.26121	2.96653	3.68182
ccq1L511R		0.365573	0.422966	1.31708
ccq1V516R		0.668568	0.746562	0.932102
	Enrichment of H3K9me2 at telomeres (Fig 3G)
	ccq1WT			ccq1L511R
23 bp	7.16467	7.21886	4.77887	1.3805	1.45388	1.2462
116 bp	8.14358	10.4654	7.65003	4.24364	4.11883	3.27478
744 bp	12.9809	13.8251	11.3312	2.71293	2.07273	2.63237
1297 bp	14.6755	15.3016	12.7497	1.96915	1.38882	1.42321
2012 bp	20.4994	18.8978	24.4708	1.32875	0.532209	1.83376
2275 bp	17.0085	17.8331	13.4914	1.94424	1.86468	1.29239
2758 bp	20.1906	18.9179	18.3567	2.7074	2.32333	2.66294
	Enrichment of Swi6 at telomeres (Fig 3H)
	ccq1WT			ccq1L511R
23 bp	2.4665	2.79414	3.73773	1.11576	1.19597	1.39384
116 bp	2.12006	2.74431	2.78362	1.24001	0.878405	1.44977
744 bp	2.18854	3.1969	1.59687	1.89858	0.915832	1.58722
2012 bp	2.60738	2.87402	3.64319	1.15144	1.15559	1.58611
2758 bp	2.66678	3.0335	3.93177	3.40974	1.91254	2.67064
