# Supplementary material for: Ccq1–Raf2 interaction mediates CLRC recruitment to establish heterochromatin at telomeres
Source: Life Sci Alliance. 2021 Sep 7;4(11):e202101106. doi: 10.26508/lsa.202101106 (PMC8424379; doi:10.26508/lsa.202101106)
Supplement: Supplementary file 3 [file LSA-2021-01106_SdataF4.xlsx]

## Sheet: Fig 3B
Source data for Fig 4A, and C-F
Description: ChIP-qPCR analysis as described in the methods. The graph represents three independent experiments listed below. Error bars represent SEM.
	Enrichment of H3 at telomeres (Fig 4A)
	ccq1WT			ccq1L511R
23 bp	0.370349	0.338607	0.573435	0.232393	0.311568	0.299464
116 bp	0.495584	0.456829	0.541978	0.293982	0.274187	0.278425
744 bp	0.720513	0.402779	0.781117	0.318437	0.319318	0.485847
1297 bp	1.18568	0.618147	0.870657	0.437381	0.525193	0.396501
2012 bp	0.624994	0.611498	1.31723	0.516677	0.54981	0.753553
2275 bp	0.731813	0.660291	0.774375	0.519162	0.517295	0.510866
2758 bp	0.968262	0.813804	1.08009	0.647082	0.791821	0.633884
	Enrichment of Taz1-13Myc at telomeres (Fig 4C)
	ccq1WT			ccq1L511R
23 bp	3.73059	7.14627	6.31326	3.53369	3.65264	4.28378
116 bp	2.12088	3.92031	3.74134	2.55396	1.92572	2.84186
744 bp	1.55834	2.22883	1.93124	1.75835	1.52648	1.97864
	Enrichment of Rap1-13Myc at telomeres (Fig 4D)
	ccq1WT			ccq1L511R
23 bp	21.4307	20.1744	20.1129	11.431	9.744	12.7767
116 bp	9.24023	8.74902	9.00839	5.87456	4.94413	5.57464
744 bp	5.33676	5.18018	4.97357	2.35798	1.90365	1.93902
	Enrichment of Poz1-13Myc at telomeres (Fig 4E)
	ccq1WT			ccq1L511R
23 bp	54.3723	28.493	52.9583	27.8891	5.88889	34.5698
116 bp	19.8993	11.2638	17.4934	9.16156	2.70388	15.8167
744 bp	8.40983	5.49029	9.58672	3.84897	1.51552	8.26981
	Enrichment of Tpz1-13Myc at telomeres (Fig 4F)
	ccq1WT			ccq1L511R
23 bp	46.9876	46.9177	35.6292	15.0905	24.9793	18.1339
116 bp	22.0143	30.208	25.7406	11.7966	21.1132	7.30716
744 bp	15.4988	15.3219	11.6057	2.59576	7.48071	2.5873
